# Supplementary material
Source: ML conference proceedings conference paper supplement (https://openreview.net/forum?id=0EV92jgJaZ)

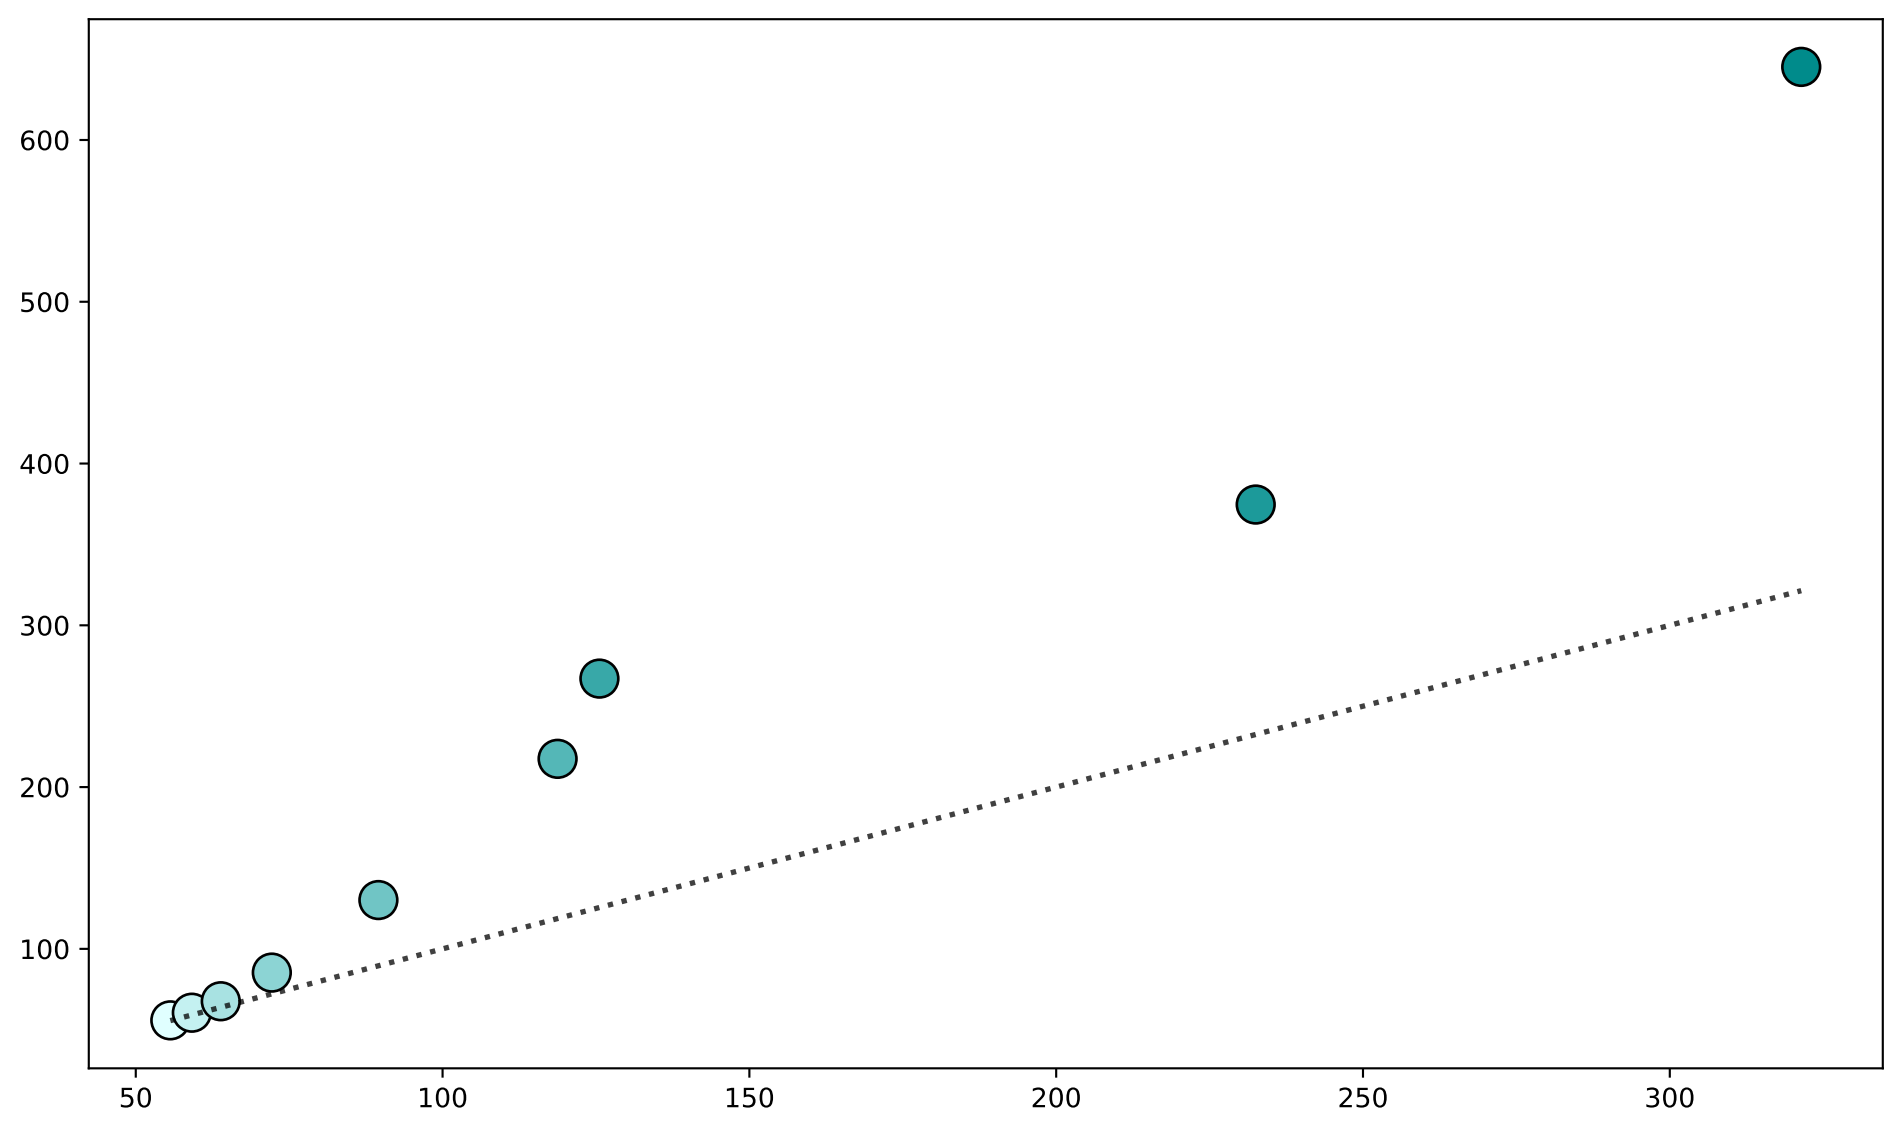

Supplement: supplementary_material [file coloring_mb_non_inc.pdf › code/experiments/analysis/coloring_non_inc/coloring_mb_non_inc.pdf]

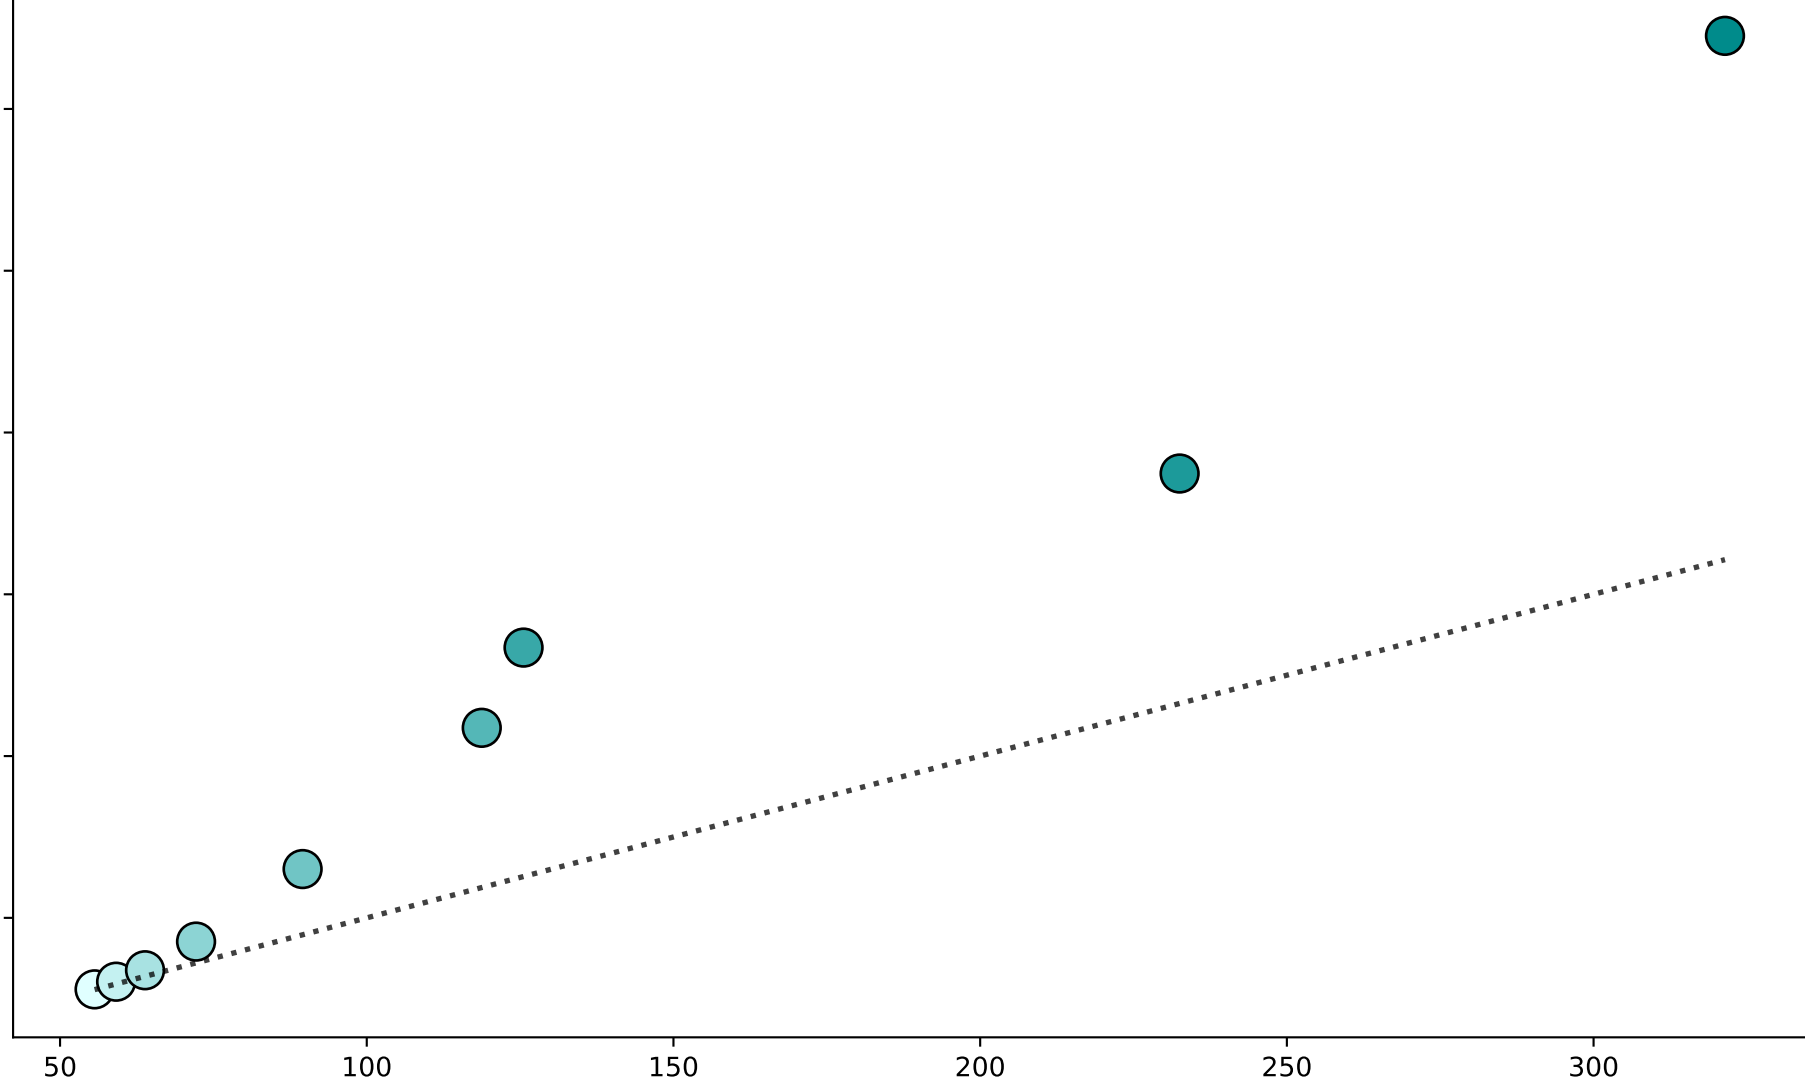

Supplement: supplementary_material [file coloring_mb_non_inc_crop.pdf › code/experiments/analysis/coloring_non_inc/coloring_mb_non_inc_crop.pdf]

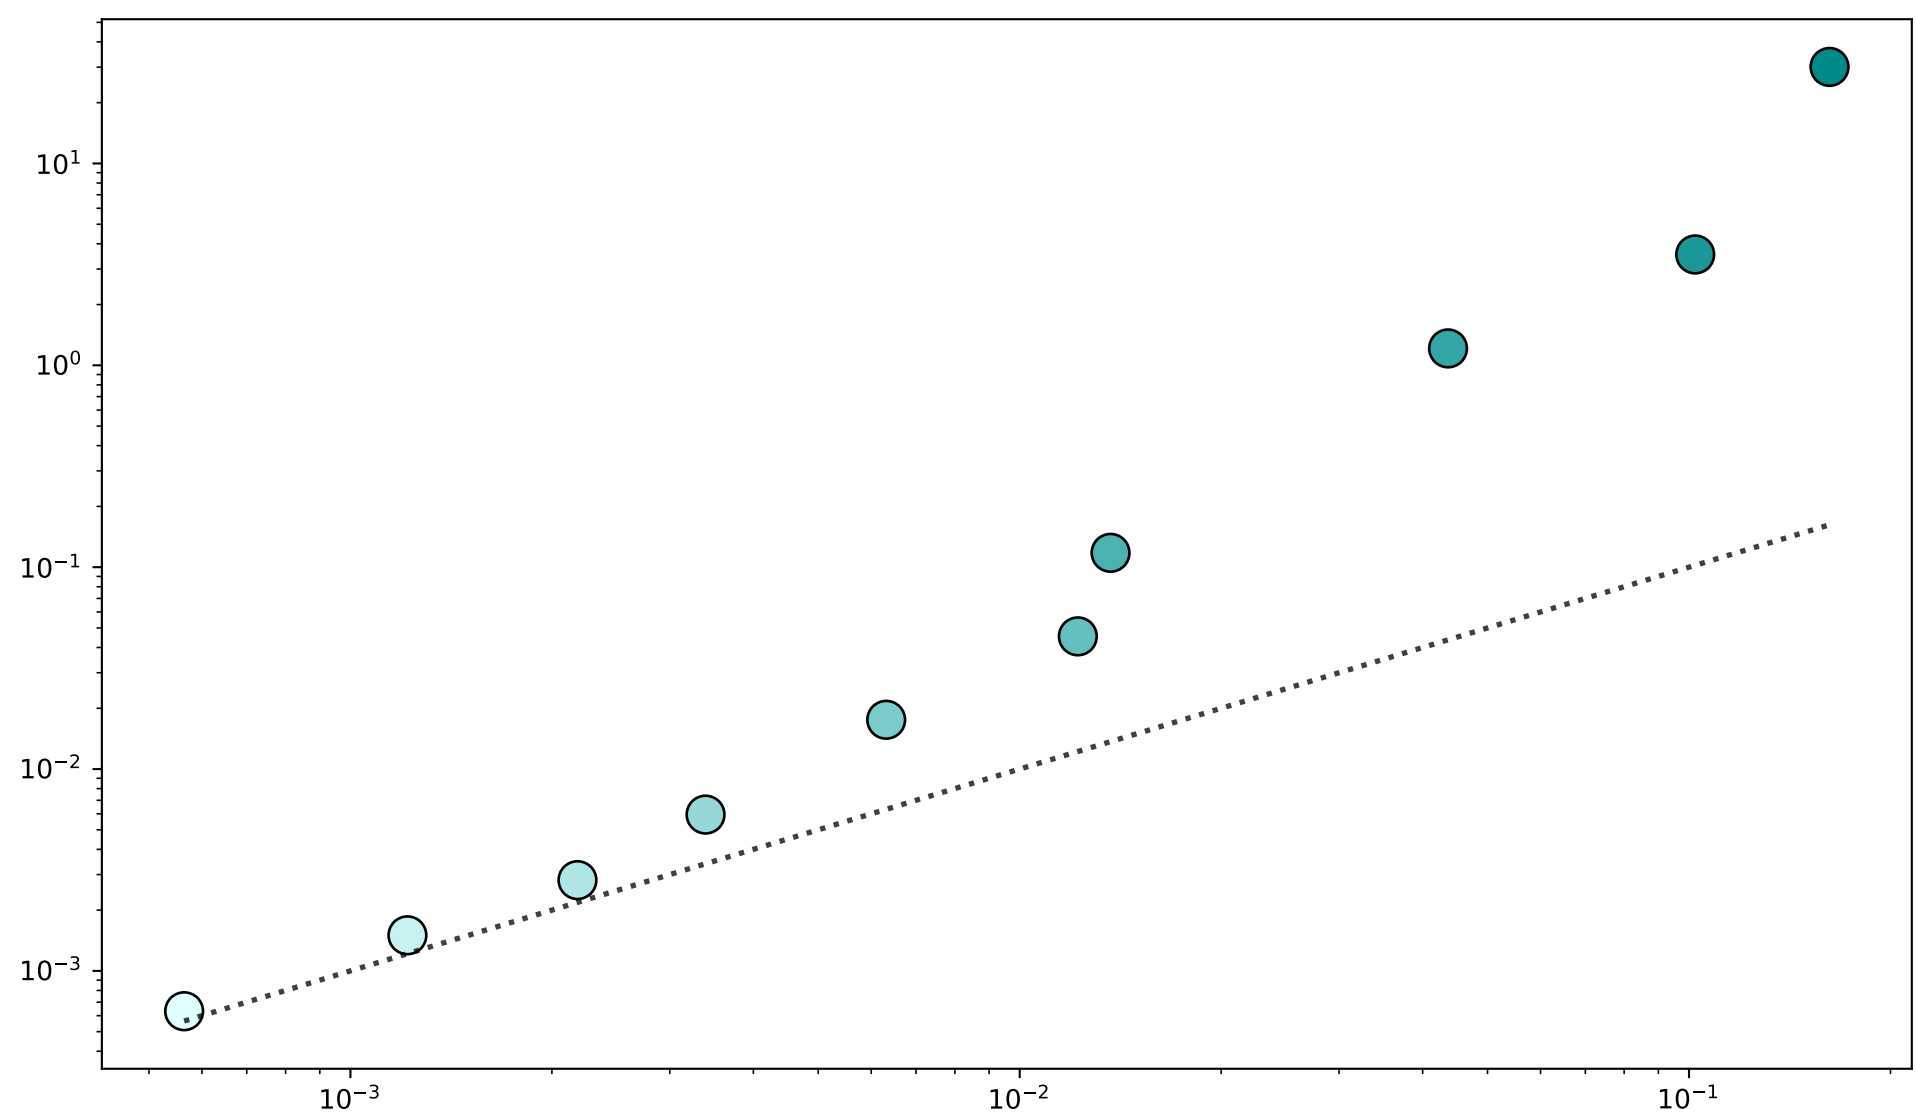

Supplement: supplementary_material [file coloring_time_non_inc.pdf › code/experiments/analysis/coloring_non_inc/coloring_time_non_inc.pdf]

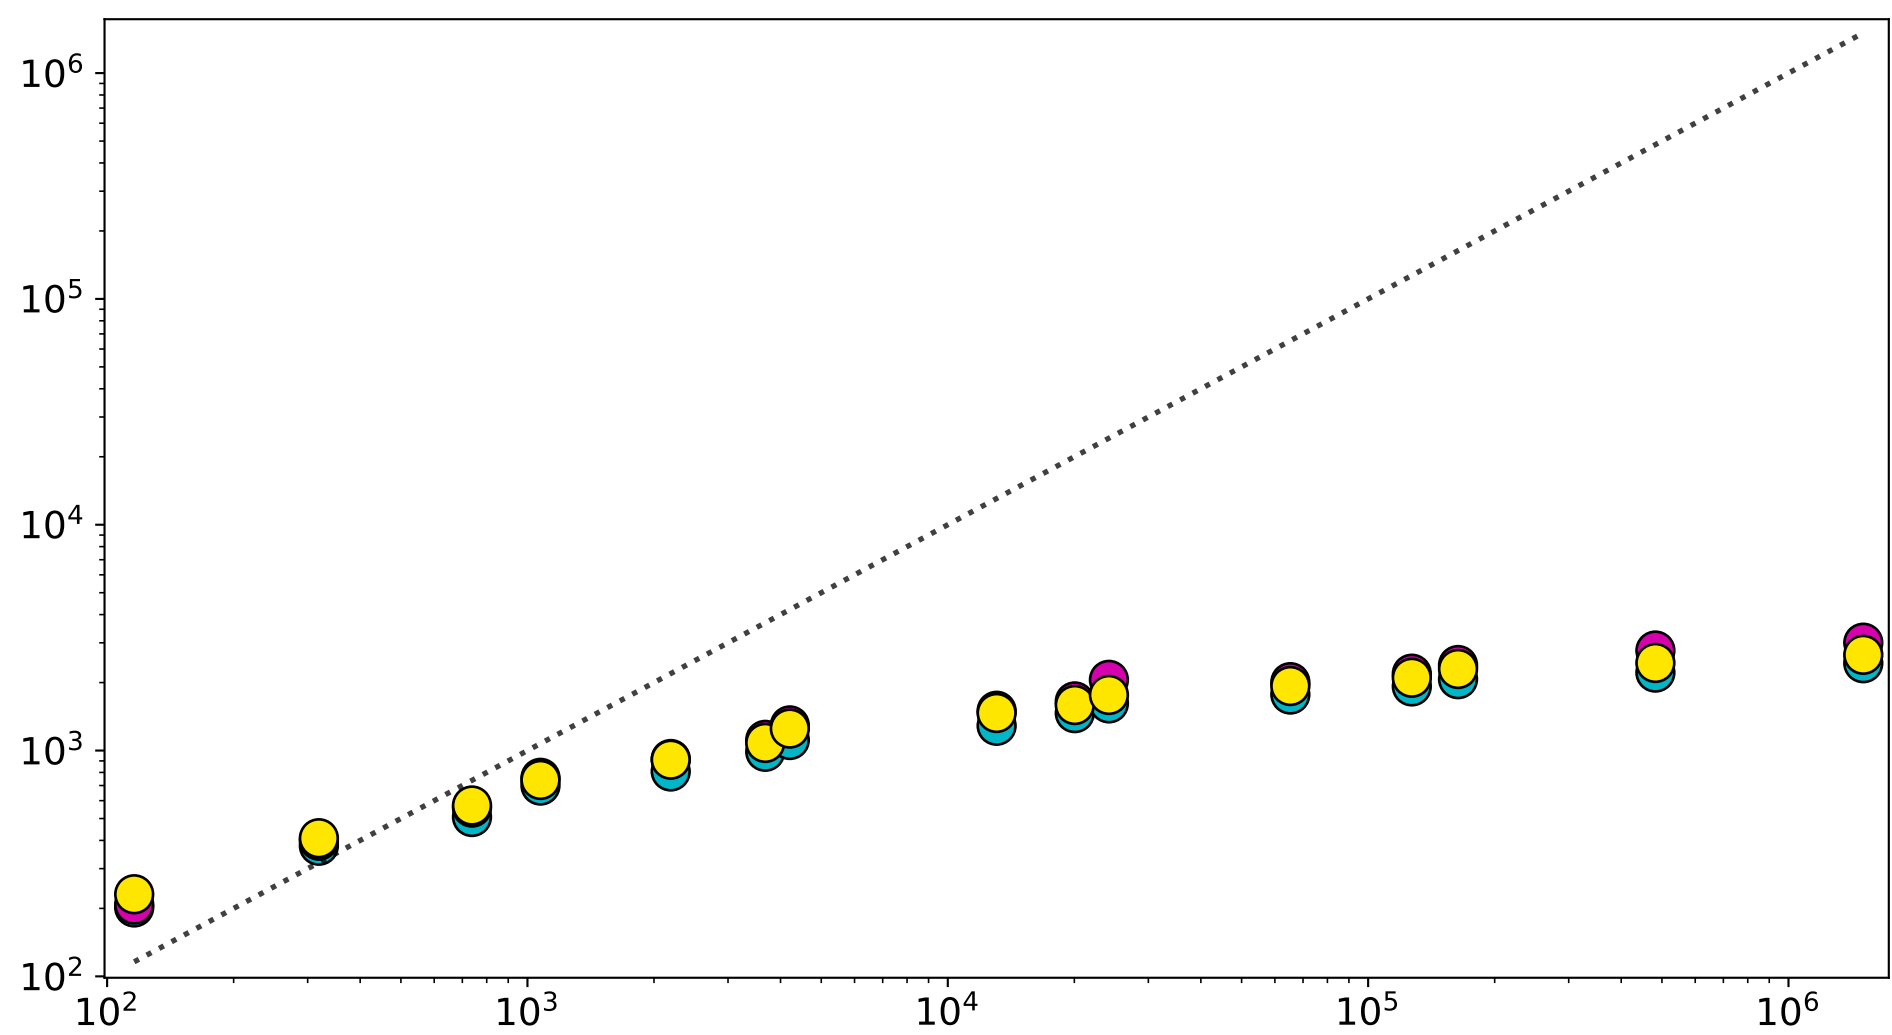

Supplement: supplementary_material [file top_down_vs_bottom_up_coloring.pdf › code/experiments/analysis/top_down_comparison/top_down_vs_bottom_up_coloring.pdf]

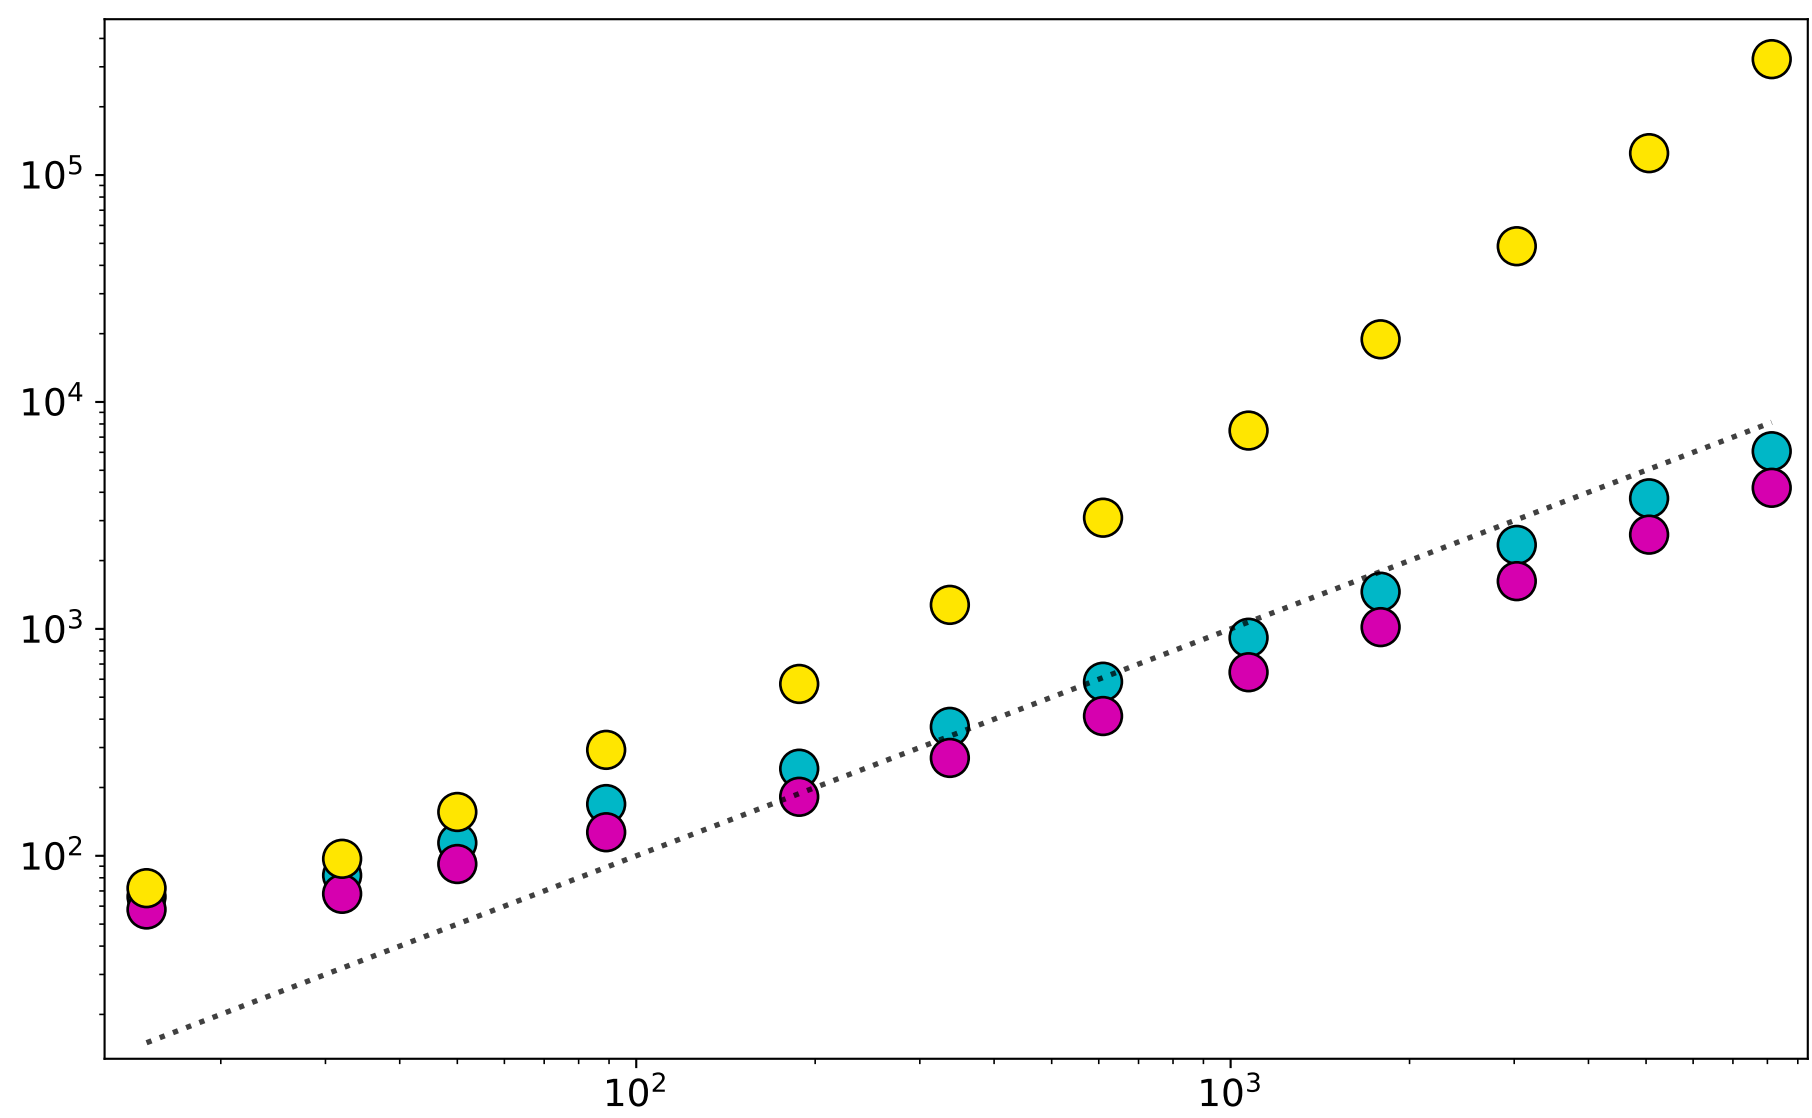

Supplement: supplementary_material [file top_down_vs_bottom_up_irl.pdf › code/experiments/analysis/top_down_comparison/top_down_vs_bottom_up_irl.pdf]

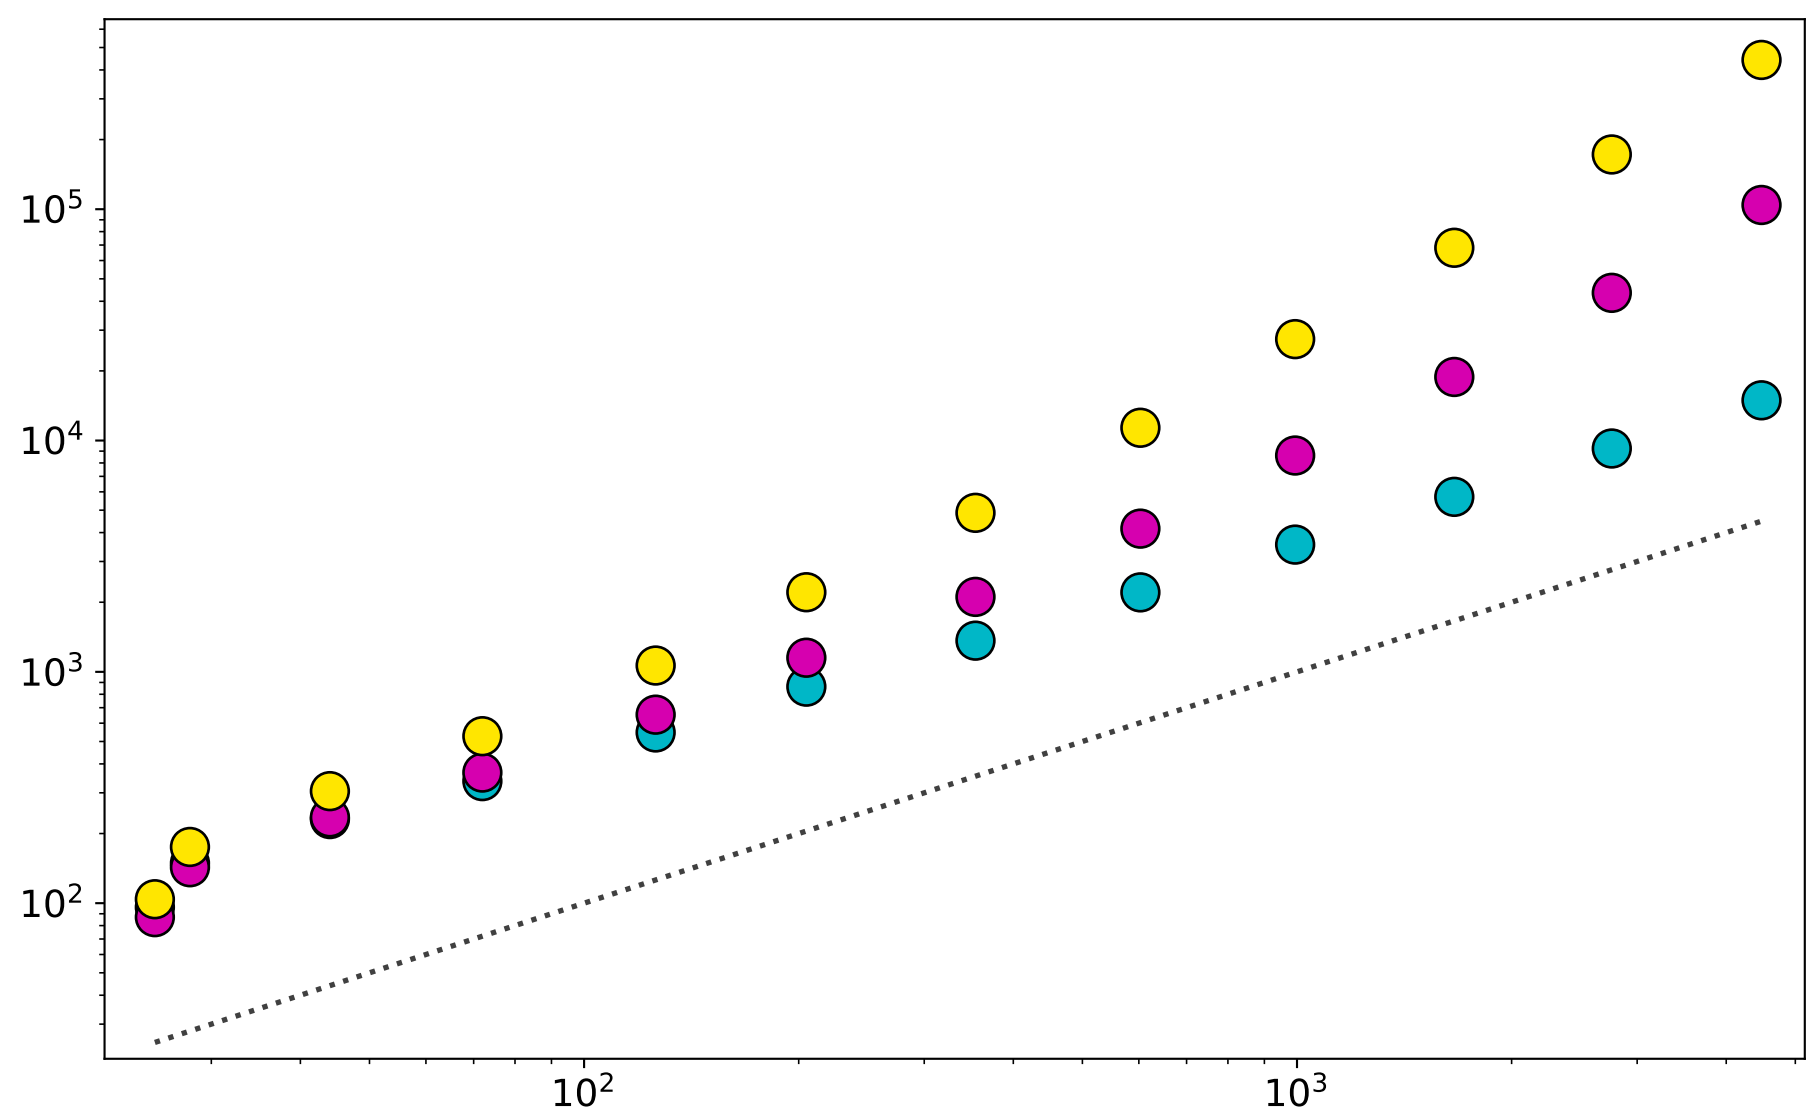

Supplement: supplementary_material [file top_down_vs_bottom_up_irn.pdf › code/experiments/analysis/top_down_comparison/top_down_vs_bottom_up_irn.pdf]

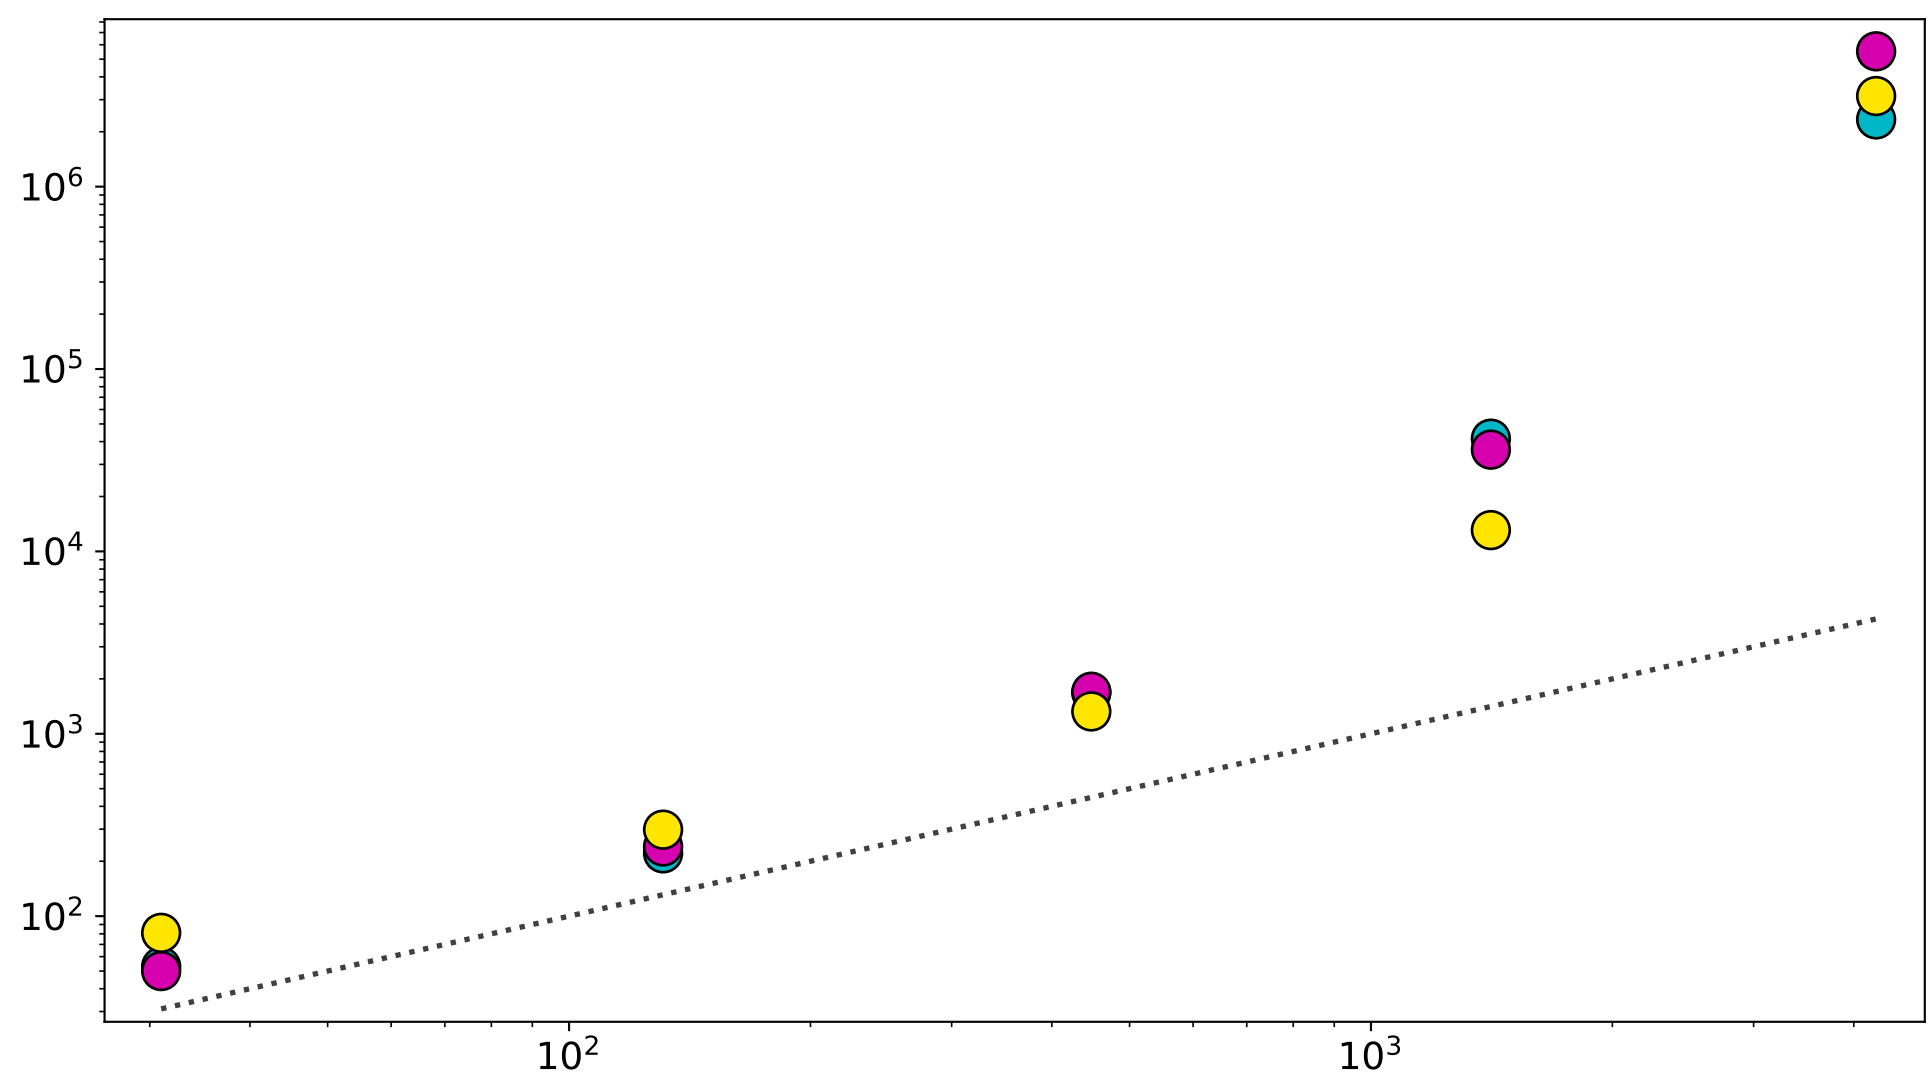

Supplement: supplementary_material [file top_down_vs_bottom_up_pin.pdf › code/experiments/analysis/top_down_comparison/top_down_vs_bottom_up_pin.pdf]
